# Supplementary material for: Cleavable energy transfer labeled oligonucleotide probe for enhanced isothermal amplification detection and nano digital chip-based readout
Source: Royal Society of Chemistry journal article supplement (doi:10.1039/d4nr03142c), 2024-11-26
Supplement: d4nr03142c1.pdf [file d4nr03142c1.pdf]

## Supplementary Information

### **Cleavable Energy Transfer Labeled Oligonucleotide Probe for Enhanced Isothermal Amplification Detection and Nano Digital Chip-based Readout**

*Li Liu,<sup>a</sup> Stephen J. Dollery,<sup>b</sup> Gregory J. Tobin,<sup>b</sup> Guoyu Lu,<sup>c</sup> and Ke Du<sup>\*a</sup>*

- a. Department of Chemical and Environmental Engineering, University of California, Riverside, CA, USA
- b. Biological Mimetics, Inc., 124 Byte Drive, Frederick, MD, USA
- c. Intelligent Vision and Sensing Lab, University of Georgia, Athens, GA, USA

\*Email: [kdu@ucr.edu](mailto:kdu@ucr.edu)

Table S1: Primers and target sequence.

| Name               | Sequence                                                                                                                                                                                                                                                                                                                                                                                                                                                                            | Sources  |
|--------------------|-------------------------------------------------------------------------------------------------------------------------------------------------------------------------------------------------------------------------------------------------------------------------------------------------------------------------------------------------------------------------------------------------------------------------------------------------------------------------------------|----------|
| HPV 16 FIP         | AGTCCTCCAAAATAGTGGAAATTCATTTTTCAAC<br>TGTGCAAAATAACCT                                                                                                                                                                                                                                                                                                                                                                                                                               | IDT      |
| HPV 16 BIP         | CCAGGAGGCACACTAGAAAGAGTGTATGTTTT<br>GACAAGCAAT                                                                                                                                                                                                                                                                                                                                                                                                                                      | IDT      |
| HPV 16 F3          | TACGACATGGGGAGGAAT                                                                                                                                                                                                                                                                                                                                                                                                                                                                  | IDT      |
| HPV 16 B3          | AAGGGGATCTTCTTTAGGTG                                                                                                                                                                                                                                                                                                                                                                                                                                                                | IDT      |
| HPV 16 LB          | TTATAGGTTTGTAACATCCCAGGCA                                                                                                                                                                                                                                                                                                                                                                                                                                                           | IDT      |
| HPV 16 FQ LB probe | /56-<br>FAM/TTATAGGTT/ZEN/TGTAACATCCCAGGCA/<br>3IABkFQ/                                                                                                                                                                                                                                                                                                                                                                                                                             | IDT      |
| L1 genes of HPV 16 | Catttgtgggtaaccaactatttgttactgttggatactacacgcagtaca<br>aatatgtcattatgtgctgccatatctacttcagaaactacatataaaaat<br>actaactttaaggagtacctacgacatggggaggaatatgatttacagtt<br>tattttcaactgtgcaaaataaccttaactgcagacgttatgacatacat<br>acattctatgaattccactattttggaggactggaattttggtctacaacct<br>ccccaggaggcactagaagatacttataggttgtaacatcccagg<br>caattgctgtcaaaaacatacacctccagcacctaaagaagatcccctt<br>aaaaatacactttttgggaagtaatttaaggaaaagttttctgcaga<br>cctagatcagttccttaggacgcaaattttactacaagc  | Synthego |
| L1 genes of HPV 18 | aacaatggtgttctggcataatcaattatttgttactgtgtagataccactcg<br>cagtaccaatftaacaatatgtgcttctacacagtctcctgtacctgggca<br>atatgatgctaccaatftaagcagtagcagacatgttgaggaatatg<br>attgcagtttattttcagttgttactattactttaactgcagatgttatgt<br>cctatattcatagtagaatagcagtagtttagaggattggaactttgggtg<br>ttcccccccgaactactagtttgggtggatacatatcgttttgtacaate<br>tgttgctattacctgtcaaaaggatgctgcaccggctgaaaataaggatc<br>cctatgataagftaaagttttggaatgtggatttaaggaaaagttttcttag<br>acttagatcaatatccccttgacgtaattt | Synthego |

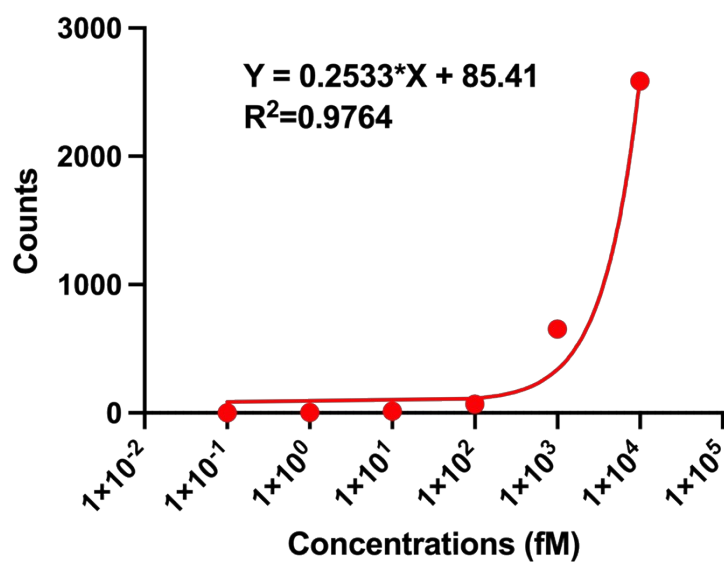

Figure S1. Linear response analysis for positive spots quantification range of the dLAMP assay at target concentrations of  $1 \times 10^{-1}$  to  $1 \times 10^4$  fM, for each concentration's testing, five replicates were run ( $n = 5$ ).
